# Supplementary material for: NOTCH activity differentially affects alternative cell fate acquisition and maintenance
Source: eLife. 2018 Mar 26;7:e33318. doi: 10.7554/eLife.33318 (PMC5889214; doi:10.7554/eLife.33318)
Supplement: Figure 1—source data 1. [file elife-33318-fig1-data1.xlsx]

## Sheet: Sheet1
		number of eYFP;Sox2 /SOX2 in Sox2CreERT2/+;Rosa26floxSTOPNICD1/+ embryos
	Embryo 1	45/1043
	Embryo 2	36/847
	Embryo 3	44/779
		% eYFP;Sox2 /SOX2 in Nkx3.1Cre/+;Rosa26floxSTOPNICD1/+ embryos
	Embryo 1	65/1087
	Embryo 2	63/871
	Embryo 3	54/843
		% GFP;Sox2 /SOX2 in Sox2CreERT2/+;Rosa26floxSTOPNICD1/+ embryos
	Embryo 1	235/254
	Embryo 2	469/640
	Embryo 3	467/538
		% GFP;Sox2 /SOX2 in Nkx3.1Cre/+;Rosa26floxSTOPNICD1/+ embryos
	Embryo 1	248/430
	Embryo 2	478/896
	Embryo 3	605/894
