# Supplementary material for: NOTCH activity differentially affects alternative cell fate acquisition and maintenance
Source: eLife. 2018 Mar 26;7:e33318. doi: 10.7554/eLife.33318 (PMC5889214; doi:10.7554/eLife.33318)
Supplement: Figure 2—source data 1. [file elife-33318-fig2-data1.xlsx]

## Sheet: Sheet1
		Number of recombined cells counted in the ventral half of IL/recombined cells in IL
Sox2CreERT2/+;Rosa26ReYFP/+
embryo 1		.28/61
embryo 2		.35/65
embryo 3		.19/44
embryo 4		.27/58
embryo 5		.26/64
Sox2CreERT2/+;Rosa26floxSTOPNICD1/+
embryo 1		.32/33
embryo 2		.10/11
embryo 3		.11/11
embryo 4		.13/23
embryo 5		.54/68
