# Supplementary material for: NOTCH activity differentially affects alternative cell fate acquisition and maintenance
Source: eLife. 2018 Mar 26;7:e33318. doi: 10.7554/eLife.33318 (PMC5889214; doi:10.7554/eLife.33318)
Supplement: Figure 3—source data 1. [file elife-33318-fig3-data1.xlsx]

## Sheet: Sheet1
Pou1f1-Cre; Rosa26-floxSTOP-NICD1/+	Week	Males control
Weights	3	10.5	10.1	10.5	11.7	9.2	11.1	12.3	11.5	12.1	12.2	9.1	9.5	11.1	8.4
(g)	4	17.2	16.2	18	18.1	14.6	17.8	21.5	20.1	20.7	20.3	12.9	14	16.9	12.8
Each column represents the same mouse	5	22.3	21.1	22.9	22.1	20.4	22.2	25.3	23.7	24.3	24.4	20.7	18.9	22.5	18.1
	6	23.8	23.3	25.5	23.9	22.4	24.8	27.2	26.2	27.3	27
	7	25.1	25.3	27.2	26.2	25	26.2	27.9	26.9	29.2	28.2
	8	26	26.2	27.9	27.3	25.6	26.4	29	28.5	31.4	29.9
	9	26.6	27.2	29	28.1	26.3	28.1	30.2	29.4	32.1	30.9
	10	29	28.8	30.2	29.8	27.4	30.1	32.9	31	34.1	32.4
	11	30.8	29.6	31.1	31.2	28.5	29
	12	31.5	29.9	32.1	32.9	29.3
	13	31.4	30.2	32.5	33.6	28.9
	14	33.3	31	33.3	35.6	29.1
	Week	Males mutant
	3	10.3	9.9	10.3	10.7	8.5	8.8
	4	14.9	14.9	16.3	17.8	12.5	13.9
	5	19.9	19.9	21.4	22.9	17.3	18.9
	6	22.2	21.8	23.5	25.2	20.2	21.3
	7	24.4	23.5	25.3	25.8	22.4	22.8
	8	25.7	23.6	26.5	27.4	22.7	23.1
	9	27.6	24.5	27.5	29	25.2	24.4
	10	29.5	25.1	28.8	29.2	27.1	26.4
	11	30.6	26.5	29.1	30.2	26	24.9
	12	31.1	27	30.5	30.2
	13	33	27.4	30.9	31.7
	14	33.6	27.3	31.5	31.9
	Week	Females control
	3	10.5	9.3	11.9	10.7	9.3
	4	14.6	13.2	17.3	14.4	12.7
	5	18.9	16.9	19.8	17.9	15.2
	6	19.5	18.7	21.6	19.4	16.6
	7	20.3	20.2	21.4	20.7	18.2
	8	21.4	20.3	21.9	21.3	18.6
	9	21.4	21	22.6	22.4	19
	10	22.3	21.9	24.5	25.5	20.8
	11	22.1	23.2	26	23.8	19.5
	12	23.4	23.2	26
	13	22.7	23.5	26
	14	22.9	23.8	27.2
	Week	Females mutant
	3	9.7	8.8	10.2	9.6	9.6
	4	13.4	12.1	13.4	12.4	13.6
	5	16.9	15.1	16.7	15.5	16.8
	6	19.1	16.5	18.5	17.9	18
	7	19.7	18.2	20.1	19.4	19.4
	8	19.3	18.6	20	18.7	19.8
	9	21.1	18.9	21.8	19.9	20.6
	10	22.2	20.2	22.8	21.3	21.3
	11	22.8	20.5	21.9	20.5	20
	12	23.1	21.5	22.2
	13	23.1	21	22
	14	24.5	21.1	22.8
Average	Week	M control	M mut	F control	F mut
	3	10.6643	9.75	10.34	9.58
	4	17.2214	15.05	14.44	12.98
	5	22.0643	20.05	17.74	16.2
	6	25.14	22.3667	19.16	18
	7	26.72	24.0333	20.16	19.36
	8	27.82	24.8333	20.7	19.28
	9	28.79	26.3667	21.28	20.46
	10	30.57	27.6833	23	21.56
	11	30.0333	27.8833	22.92	21.14
	12	31.14	29.7	24.2	22.2667
	13	31.32	30.75	24.0667	22.0333
	14	32.46	31.075	24.6333	22.8
Standard deviation	Week	M control	M mut	F control	F mut
	3	1.26163	0.893868	1.08995	0.501996
	4	2.86227	1.84364	1.7869	0.679706
	5	2.07276	1.94294	1.7869	0.83666
	6	1.7627	1.7603	1.79527	0.964365
	7	1.41955	1.36626	1.1929	0.709225
	8	1.89021	1.95925	1.30958	0.630079
	9	1.89411	1.92111	1.43944	1.1149
	10	2.05537	1.76115	1.93907	0.991464
	11	1.15701	2.39116	2.38265	1.16748
	12	1.50599	1.83848	1.56205	0.802081
	13	1.85122	2.39513	1.72143	1.0504
	14	2.48455	2.67628	2.26789	1.7
Standard error	Week	M control	M mut	F control	F mut
	3	0.337184	0.36492	0.487442	0.224499
	4	0.764974	0.752662	0.799125	0.303974
	5	0.553967	0.7932	0.799125	0.374166
	6	0.557415	0.718641	0.80287	0.431277
	7	0.4489	0.557773	0.533479	0.317175
	8	0.597736	0.799861	0.585662	0.28178
	9	0.598971	0.78429	0.643739	0.498598
	10	0.649966	0.718988	0.867179	0.443396
	11	0.472346	0.976189	1.06555	0.522111
	12	0.673498	0.919239	0.90185	0.463081
	13	0.827889	1.19757	0.99387	0.606447
	14	1.11113	1.33814	1.30937	0.981495
