# Supplementary material for: NOTCH activity differentially affects alternative cell fate acquisition and maintenance
Source: eLife. 2018 Mar 26;7:e33318. doi: 10.7554/eLife.33318 (PMC5889214; doi:10.7554/eLife.33318)
Supplement: Figure 3—source data 2. [file elife-33318-fig3-data2.xlsx]

## Sheet: Sheet1
Pou1f1-Cre; Rosa26-floxSTOP-NICD2/+				Week	Males control
Weights				3	14.3	14.3	12.9			11.8	10.8	13.7	9.6
(g)				4	20.2	19.8	17.7	18.2		20.4	18.2	22.7	15.6	18.8	22.1
Each column represents the same mouse				5	24.3	23.7	23.6	22.9		26.5	25	26.3	20.5	22.2	25.5
				6	27	25.5	25.1	25		28.7	27.3	28.5	22.2	24	27.8
				7	28.8	27.2	26.7	26.6	28.5
				8	30.8	29.4	29.5	29.1	30.4
				9	32.3	30.4	30.4	31.8	31.7
				10	33.7	29.1	32.5	34.6	32.6
				11	34.8	28.9	32.8	35.7	33.7
				12	35.8	31.3	34.3	38	34.7
				13	36.9	33.7	35.7	39.8	35.1
				14	37.2	35.7	36.5	40	35.5
				Week	Males mutant
				3	11.9	12.2		10.7	9
				4	17.5	17.7		17.3	14.7	19.4	17.1
				5	20.9	21.3		21.5	18.8	21.9	20.1	20.8	21.5	19.9
				6	22.2	23		24.2	21	23.9	21.7	21.9	23.5	21.3
				7	23.6	25.4	25.2
				8	25	27.3	27.8
				9	27.7	29	29.9
				10	29.6	30.8	32.1
				11	30.8	32.1	33.4
				12	33.3	34.1	35
				13	35.2	34.5	35.9
				14	36	34.9	36.7
				Week	Females control
				3	10.8	11.2		11.3	13.2	10
				4	15.6	13.3	15.8	13.1	17.8	13.8	16.4	16.7
				5	17.8	17.4	19.7	16.1	20.8	17.6	19.4	19.2	17.3	17.7	17.9	17.9	18.5	18.3
				6	19.6	19.8	21.9	18.3	23.1	19.2	20.5	20.7	28.7	19.6
				7	19.6	19.1	22.7	18.7
				8	20.9	20.1	23.3	19.1
				9	21.1	22.3	25.8	20.7
				10	22.1	21.7	26.7
				11	22.4	21.9	27.2
				12	22.9	23.4	28.2
				13	23.4	24.2	30.4
				14	25.1	25.5	29.1
				Week	Females mutant
				3	12.4	11.3	12.7	11.3
				4	15.4	14.3	16.3	15.3
				5	17.5	17.2	18.3	18.5	17.9
				6	19.4	19.5	19.9		19.4
				7	19.8	19.7	20.1
				8	20.7	21.1	20.7
				9	21.8	21.3	21.3
				10	23	23.3	23.1
				11	23.8	25.7	24.7
				12	24.4	24.7	24.6
				13	25	27	25.9
				14	26.1	28.7	27.5
			Average	Week	M control	M mut	F control	F mut
				3	12.4857	10.95	11.3	11.925
				4	19.37	17.2833	15.3125	15.325
				5	24.05	20.7444	18.2571	17.88
				6	26.11	22.5222	21.14	19.55
				7	27.56	24.7333	20.025	19.8667
				8	29.84	26.7	20.85	20.8333
				9	31.32	28.8667	22.475	21.4667
				10	32.5	30.8333	23.5	23.1333
				11	33.18	32.1	23.8333	24.7333
				12	34.82	34.1333	24.8333	24.5667
				13	36.24	35.2	26	25.9667
				14	36.98	35.8667	26.5667	27.4333
			Standard deviation	Week	M control	M mut	F control	F mut
				3	1.81973	1.45258	1.17898	0.732006
				4	2.12239	1.51052	1.7258	0.818026
				5	1.87986	0.982486	1.18693	0.54037
				6	2.1042	1.16595	2.99154	0.238048
				7	1.02616	0.986577	1.82094	0.208167
				8	0.723187	1.49332	1.79165	0.23094
				9	0.870057	1.10604	2.31858	0.288675
				10	2.08686	1.25033	2.77849	0.152753
				11	2.63192	1.3	2.92632	0.950438
				12	2.4366	0.85049	2.92632	0.152753
				13	2.29957	0.7	3.83145	1.00167
				14	1.81852	0.907377	2.20303	1.30128
			Standard error	Week	M control	M mut	F control	F mut
				3	0.687794	0.726292	0.527257	0.366003
				4	0.67116	0.616667	0.610163	0.409013
				5	0.594465	0.327495	0.317219	0.241661
				6	0.665407	0.388651	0.946009	0.119024
				7	0.458912	0.5696	0.910471	0.120185
				8	0.323419	0.862168	0.895824	0.133333
				9	0.389102	0.638575	1.15929	0.166667
				10	0.933274	0.72188	1.60416	0.0881917
				11	1.17703	0.750555	1.68951	0.548736
				12	1.08968	0.491031	1.68951	0.0881917
				13	1.0284	0.404145	2.21209	0.578312
				14	0.813265	0.523874	1.27192	0.751295
