# Supplementary material for: NOTCH activity differentially affects alternative cell fate acquisition and maintenance
Source: eLife. 2018 Mar 26;7:e33318. doi: 10.7554/eLife.33318 (PMC5889214; doi:10.7554/eLife.33318)
Supplement: Figure 3—source data 3. [file elife-33318-fig3-data3.xlsx]

## Sheet: Sheet1
Pou1f1-Cre; Rosa26-flox-STOP-NICD1/+				6-week-old
GH Content				M control	M mutant	F control	F mutant
ug/pituitary				98.4	52.6	79.7	20.8
				83.3	44.1	47.5	29
				76.7	29.6	78.3	41.7
				107.1	68		29.6
				117.7	32.2		21.6
					34.4
			Average	96.64	43.4833	68.5	28.54
			Standard deviation	16.8196	14.7454	18.2	8.40524
			Standard error	7.52194	6.01977	10.5078	3.75894
			Unpaired two-tailed t test p-value		0.0003		0.0048
					***		**
				14-week-old
				M control	M mutant	F control	F mutant
				98.5	59	99.7	36.7
				100.6	65.7	101.7	18.9
				135.3	65.9	120.8	40.5
				92.6	34.5
				96
			Average	104.6	56.275	107.4	32.0333
			Standard deviation	17.4188	14.8666	11.6477	11.5314
			Standard error	7.78993	7.4333	6.72483	6.65766
			Unpaired two-tailed t test p-value		0.0032		0.0013
					**		**
