# Supplementary material for: NOTCH activity differentially affects alternative cell fate acquisition and maintenance
Source: eLife. 2018 Mar 26;7:e33318. doi: 10.7554/eLife.33318 (PMC5889214; doi:10.7554/eLife.33318)
Supplement: Figure 3—source data 4. [file elife-33318-fig3-data4.xlsx]

## Sheet: Sheet1
Pou1f1-Cre; Rosa26-floxSTOP-NICD2/+				6-week-old
GH Content				M control	M mutant	F control	F mutant
ug/pituitary				127.6	74.8	43.5	30.1
				134.8	43.3	46.6	30.7
				137.4	58.7	73.1	39.4
				122.7	60.3	79.8	37
				104.4	61.5	50.1	37.9
							51.3
			Average	125.38	59.72	58.62	37.7333
			Standard deviation	13.0909	11.1979	16.6129	7.68288
			Standard error	5.85443	5.00783	7.4295	3.13652
			Unpaired two-tailed t test p-value		<0.0001		0.0219
					***		*
				14-week-old
				M control	M mutant	F control	F mutant
				92.5	47.1	89.1	55.9
				89.1	57	113.1	45
				109.1	94.6	68.1	82.8
				68.6	92.8	76.5
				92.8
				78.4
			Average	88.4167	72.875	86.7	61.2333
			Standard deviation	13.8361	24.395	19.602	19.4562
			Standard error	5.64856	12.1975	9.80102	11.233
			Unpaired two-tailed t test p-value		0.2297		0.1487
					NS		NS
