# Supplementary material for: NOTCH activity differentially affects alternative cell fate acquisition and maintenance
Source: eLife. 2018 Mar 26;7:e33318. doi: 10.7554/eLife.33318 (PMC5889214; doi:10.7554/eLife.33318)
Supplement: Figure 5—source data 1. [file elife-33318-fig5-data1.xlsx]

## Sheet: Sheet1
Pou1f1-Cre; RBPjK f/f	Week	M comtrol
Weights	3	9.8	10.6	10
(g)	4	16	15.2	15.8	11.9	12.7	13.8	13.5	12.5	10.5
Each column represents the same mouse	5	21.4	20	22.6	18	18.5	19.8	19.3	18.2	16.4
	6	23.6	22.1	25	20.7	21.7	21.7	21.8	22.8	20.5
	7	24.9	23.9	26	22.4	23.3	23.4	23.6	24.7	22
	8	25.6	25.4	26.9	24.4	25.8	25.3	25.5	27.5	23
	9	18.2	27.1	29.1	25.6	27.8	26.7	27.3	29.1	24.3
	10	28.6	27.3	28.6	25.9	28.4	27.5	28.6	30	24.2
	11	29.8	28.6	29.7	27.8	30.1	29.3	30.7	32.3	25.7
	12	30	29.8	30.5	28.4	30.8	30.2	31.1	33.5	26.4
	13	29.9	30.4	30.1	29.3	30.9	30.6	31.5	33.7	26.6
	14	30.1	29.9	30.2	29.1	31.6	30.8	31.9	34.1	27.7
	Week	M mutant
	3	10	10	11
	4	16.7	18.9	13
	5	20	22.2	18.8
	6	22.9	24.5	21.1
	7	24.1	26.3	22.4
	8	26	27.6	24
	9	26.1	29	25.3
	10	27.4	29.6	25.5
	11	28.6	31	26.5
	12	29.9	32.8	26.7
	13	30.5	34.7	27.1
	14	32.3	37.7	26.8
	Week	F control
	3	10.4	9.6	10
	4	13.9	13.1	11.6	10.2	11.3	13.1
	5	16.8	15.7	15.5	14.1	15.5	18.2
	6	18.2	17.9	18.4	16.3	17.9	20.5
	7	19.5	17.9	19.2	17.5	18.3	20.7
	8	20.7	19.1	20.9	18.9	20.3	21.2
	9	20.7	20.9	21.2	19.2	20.8	22
	10	21.2	21.1	21.9	19.4	21.9	23.5
	11	22.2	22	22.5	20.7	22.8	24.1
	12	22.8	21.8	23.2	21	22.4	25
	13	23.9	22.2	23.3	21.1	24.2	25.4
	14	23.6	22.6	22.9	30.6	24	25.7
	Week	F mutant
	3	9.2	10.1	9.9
	4	12.6	12.9	13.1	14.6	14.2	16.9	13.6	13.4
	5	15.7	16.4	15.3	17.1	15.5	17	16.2	16.1
	6	17	18.3	17.1	20.1	18.2	18.1	18.3	18.1
	7	18.3	18.2	17.8	20	19.6	19.3	19.8	18.5
	8	19.4	19.6	20.8	21.7	19.6	20.6	20.5	20.2
	9	19.7	20.2	19.5	22	20.1	20.3	20.8	21.4
	10	21.2	20.9	20.1	22.1	21.6	22.1	21.7	21
	11	21.5	21.2	20.8	23.4	21.5	21.5	23	21.9
	12	21.5	21.4	21	24.3	22.6	22.1	23.7	22.3
	13		22	20.8	24	22.8	22.7	23.3	22.3
	14		21.8	22.1	25	23.7	23.8	23.7	23.1
Average	Week	M control	M mut	F control	F mut
	3	10.1333	10.3333	10	9.73333
	4	13.5444	16.2	12.2	13.9125
	5	19.3556	20.3333	15.9667	16.1625
	6	22.2111	22.8333	18.2	18.15
	7	23.8	24.2667	18.85	18.9375
	8	25.4889	25.8667	20.1833	20.3
	9	26.1333	26.8	20.8	20.5
	10	27.6778	27.5	21.5	21.3375
	11	29.3333	28.7	22.3833	21.85
	12	30.0778	29.8	22.7	22.3625
	13	30.3333	30.7667	23.35	22.5571
	14	30.6	32.2667	24.9	23.3143
Standard deviation	Week	M control	M mut	F control	F mut
	3	0.416333	0.57735	0.4	0.472582
	4	1.86085	2.98161	1.3914	1.37575
	5	1.86957	1.72434	1.39092	0.658868
	6	1.41284	1.70098	1.35056	0.947176
	7	1.251	1.95533	1.18279	0.834844
	8	1.30235	1.8037	0.964192	0.769044
	9	3.34627	1.94679	0.91433	0.851889
	10	1.72828	2.05183	1.34015	0.678101
	11	1.86078	2.25167	1.1089	0.896023
	12	1.93312	3.05123	1.36675	1.14635
	13	1.88215	3.80701	1.52414	1.01465
	14	1.8214	5.45008	2.99733	1.09458
Standard Error	Week	M control	M mut	F control	F mut
	3	0.24037	0.333333	0.23094	0.272845
	4	0.620285	1.72143	0.568038	0.4864
	5	0.623189	0.995546	0.567842	0.232945
	6	0.470946	0.982061	0.551362	0.334877
	7	0.417	1.12891	0.482873	0.295162
	8	0.434116	1.04137	0.39363	0.271898
	9	1.11542	1.12398	0.373274	0.301188
	10	0.576093	1.18462	0.547114	0.239745
	11	0.62026	1.3	0.452708	0.316792
	12	0.644373	1.76163	0.557973	0.405294
	13	0.627384	2.19798	0.622227	0.383503
	14	0.607134	3.1466	1.22366	0.413711
