# Supplementary material for: NOTCH activity differentially affects alternative cell fate acquisition and maintenance
Source: eLife. 2018 Mar 26;7:e33318. doi: 10.7554/eLife.33318 (PMC5889214; doi:10.7554/eLife.33318)
Supplement: Figure 5—source data 2. [file elife-33318-fig5-data2.xlsx]

## Sheet: Sheet1
GH 42 days	M control	M mutant	F control	F mutant
ug/pit	81.4	92	30.6	44.75
	102.4	88.2	31.6	30.7
	92	48.4	43.4	39.8
	47.6		35.6
	89.8		29
			34.2
Average	82.64	76.2	34.0667	38.4167
Standard deviation	20.9683	24.1504	5.16243	7.12642
Standard error	9.37729	13.9432	2.10755	4.11444
Unpaired two-tailed t test p-value		0.7034		0.3234
		NS		NS
