# Supplementary material for: NOTCH activity differentially affects alternative cell fate acquisition and maintenance
Source: eLife. 2018 Mar 26;7:e33318. doi: 10.7554/eLife.33318 (PMC5889214; doi:10.7554/eLife.33318)
Supplement: Figure 5—source data 3. [file elife-33318-fig5-data3.xlsx]

## Sheet: Sheet1
GH 100d	M control	M mutant	F control	F mutant
up/pit	64.4	85.8	70.2	85.5
	77.1	89.4	66.4	48.9
	126.8	63.4	64	66.1
	98.2		90.4	69.4
	91.6		64.2	30.8
			65.2	63
				53.4
Average	91.62	79.5333	70.0667	59.5857
Standard deviation	23.6257	14.0873	10.2158	17.3351
Standard error	10.5657	8.13333	4.17058	6.55204
Unpaired two-tailed t test p-value		0.4593		0.2216
		NS		NS
