# Supplementary material for: NOTCH activity differentially affects alternative cell fate acquisition and maintenance
Source: eLife. 2018 Mar 26;7:e33318. doi: 10.7554/eLife.33318 (PMC5889214; doi:10.7554/eLife.33318)
Supplement: Figure 7—source data 1. [file elife-33318-fig7-data1.xlsx]

## Sheet: Sheet1
		Number of EdU;PAX7/PAX7
Pomc-Cre +ve control 1		9/1181
Pomc-Cre +ve control 2		10/1035
Pomc-Cre +ve control 3		5/785
Pomc-Cre +ve control 4		16/1320
Pomc-Cre; NICD1		9/446
Pomc-Cre; NICD2		21/909
Pomc-Cre; NICD3		26/1219
