# Supplementary material for: NOTCH activity differentially affects alternative cell fate acquisition and maintenance
Source: eLife. 2018 Mar 26;7:e33318. doi: 10.7554/eLife.33318 (PMC5889214; doi:10.7554/eLife.33318)
Supplement: Figure 7—source data 2. [file elife-33318-fig7-data2.xlsx]

## Sheet: Sheet1
		Number of DAPI +ve nuclei/average 3 sections ±SD
Control embryo 1		13.3±2.5
Control embryo 2		15±1.7
Control embryo 3		20.3±5.8
Control embryo 4		19.3±7.6
PomcCre;NICD1		31.3±5.1
PomcCre;NICD2		29.7±10.2
PomcCre;NICD3		33.7±12
